# Supplementary material for: The Anti-Candida Activity of Tephrosia apollinea Is More Superiorly Attributed to a Novel Steroidal Compound with Selective Targeting
Source: MDPI journal article supplement (doi:10.3390/plants11162120), 2022-08-15

## **Supplementary Data**

### **Spectra of compound 1**

S1.  $^1\text{H}$  NMR spectrum of compound 1

S2.  $^{13}\text{C}$  NMR spectrum of compound 1

S3. HSQC spectrum of compound 1

S4. HMBC spectrum of compound 1

S5. COSY spectrum of compound 1

S1.  $^1\text{H}$  NMR spectrum of compound 1

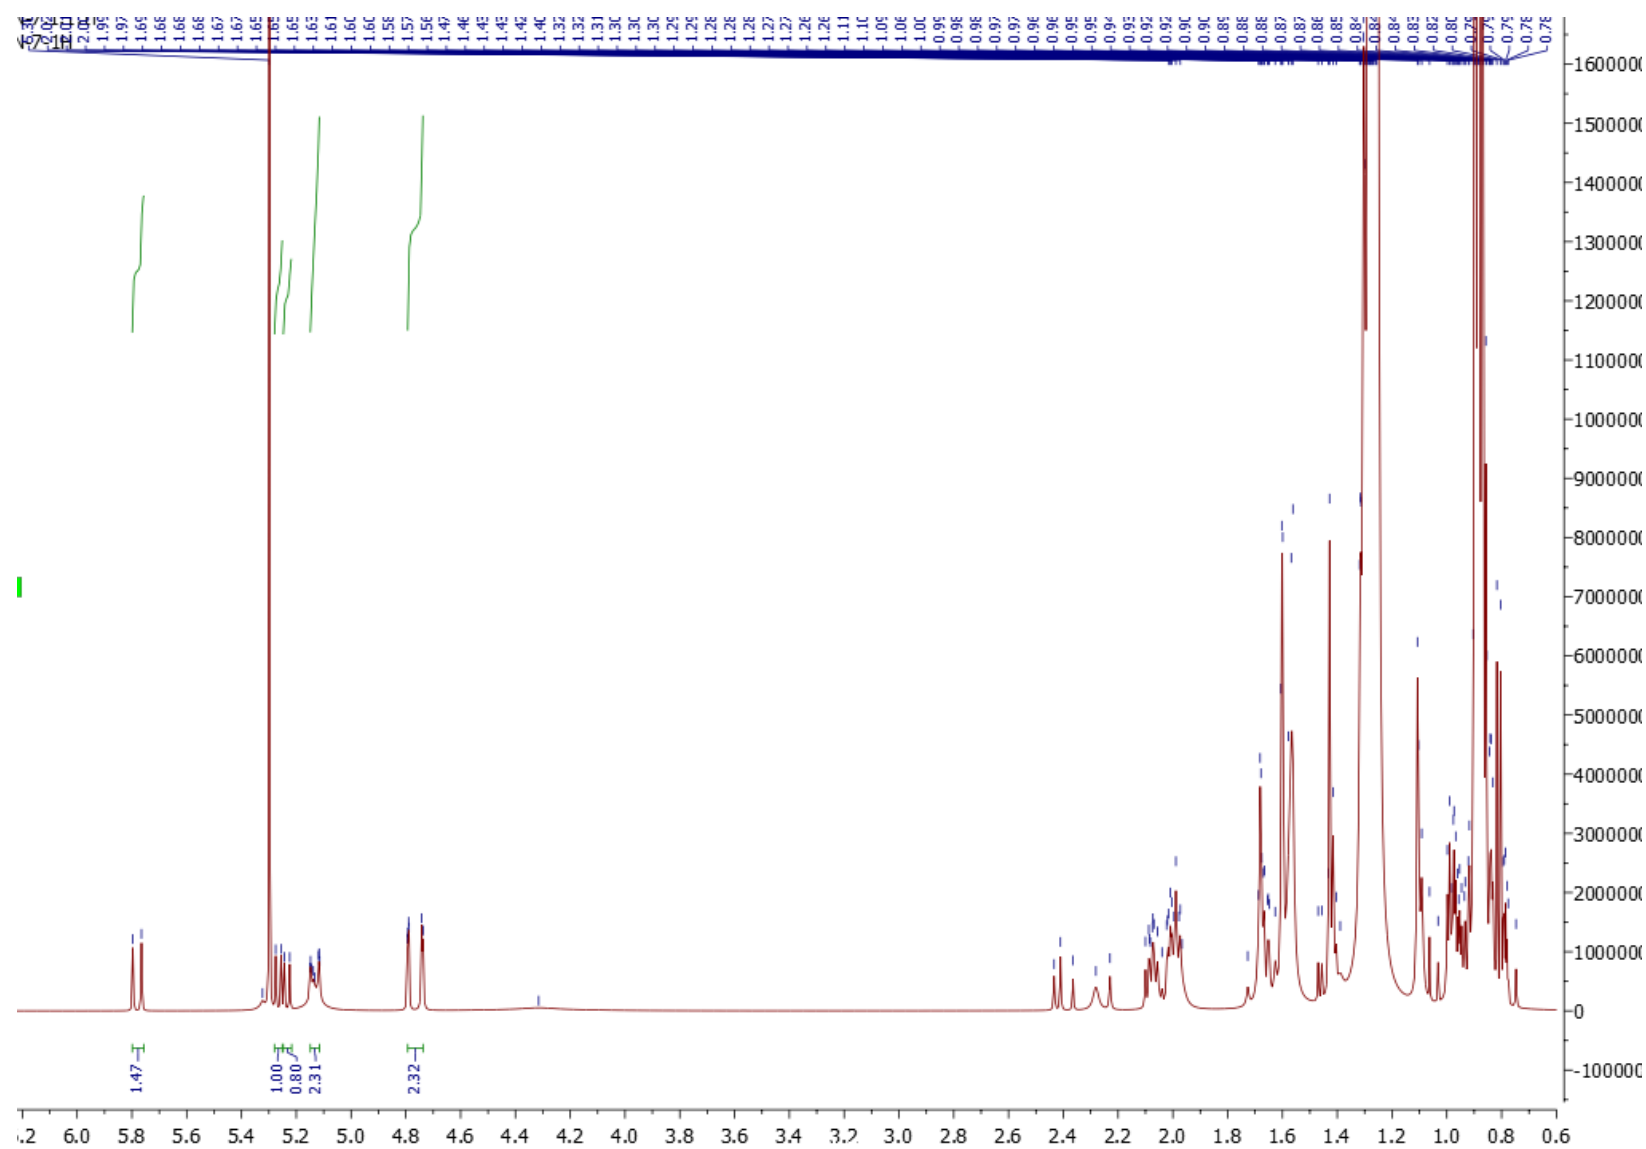

S2.  $^{13}\text{C}$  NMR spectrum of compound 1

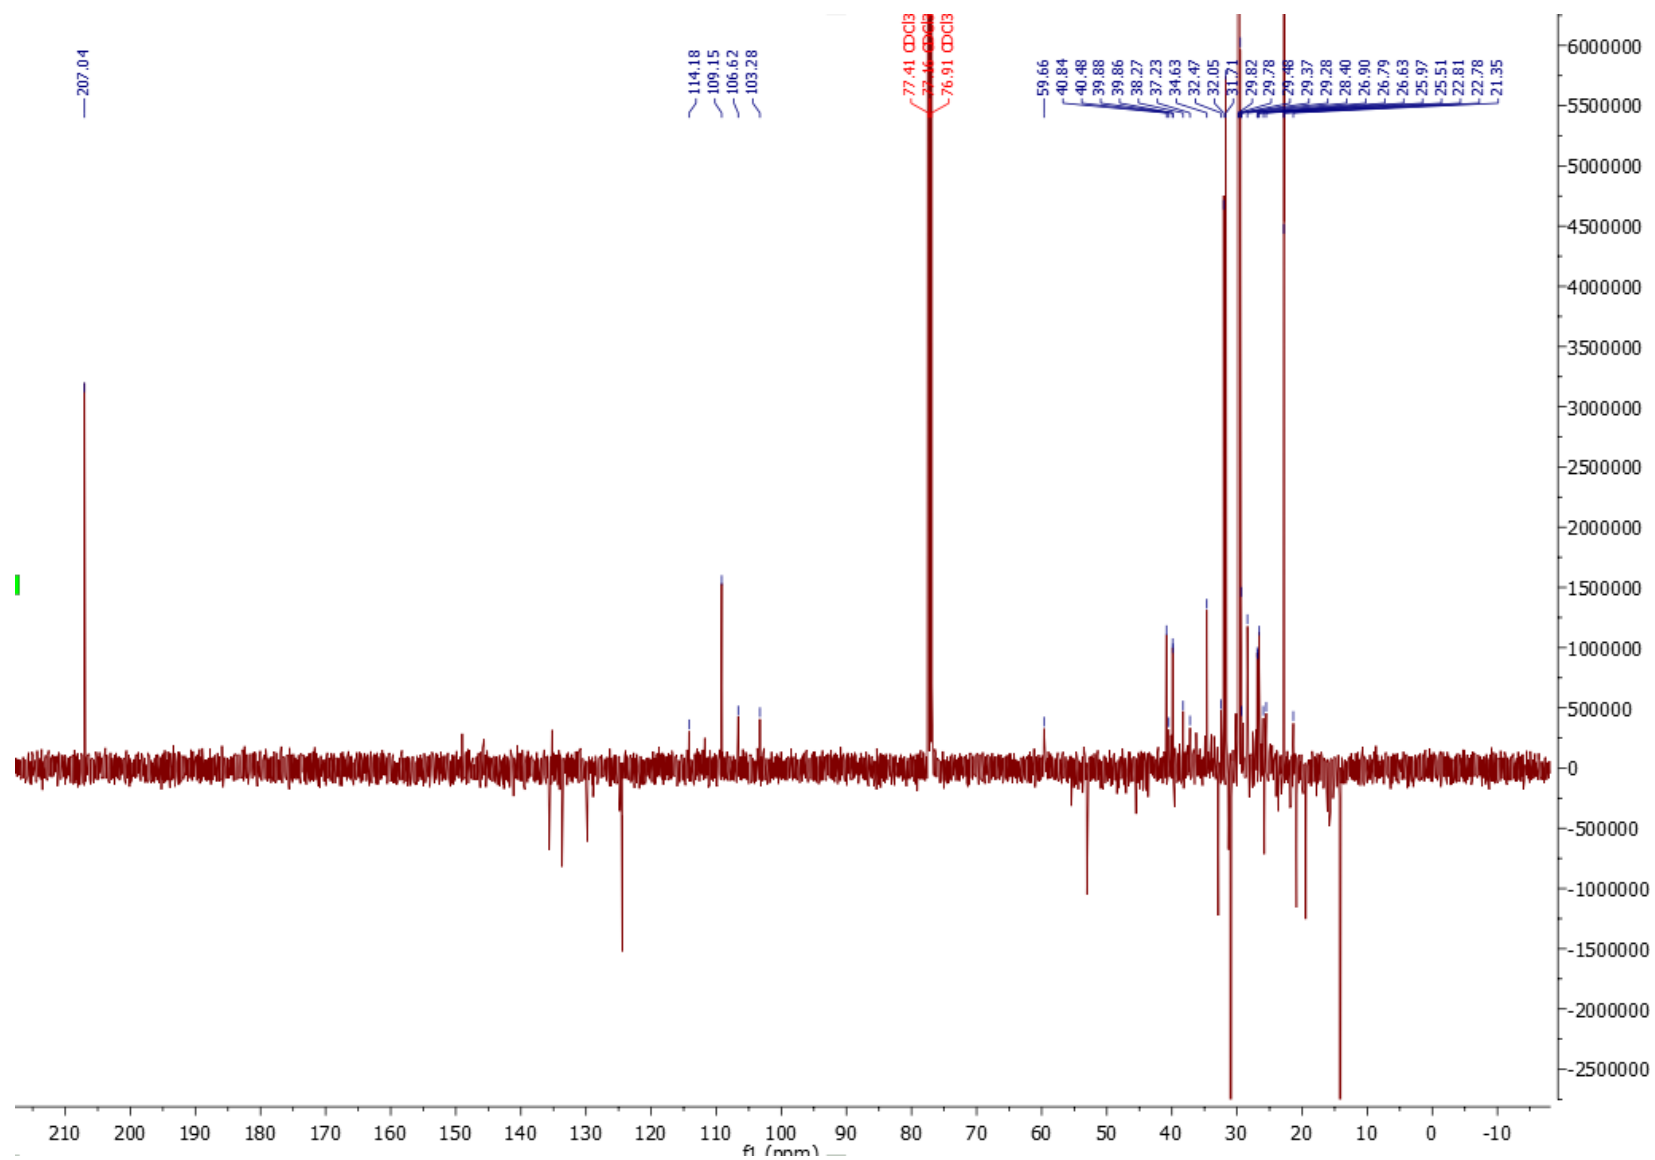

S3. HSQC spectrum of compound 1

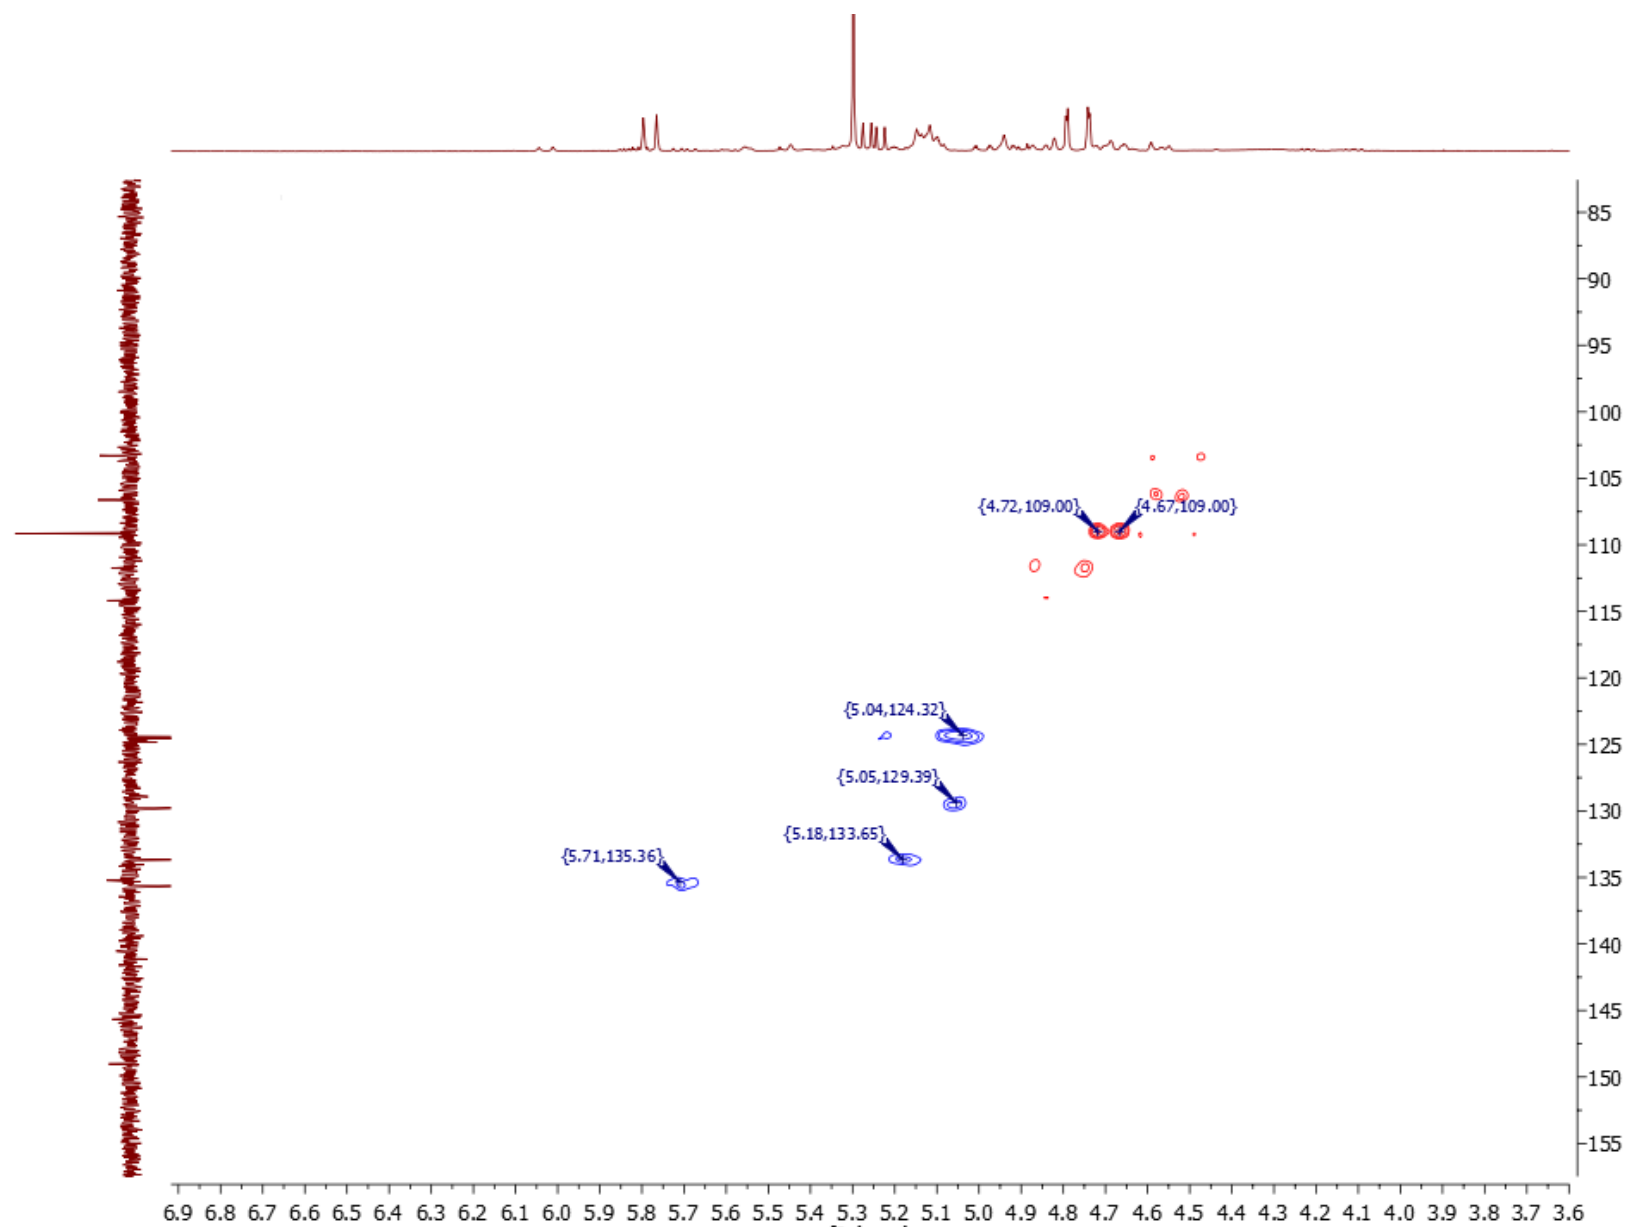

S4. HMBC spectrum of compound 1

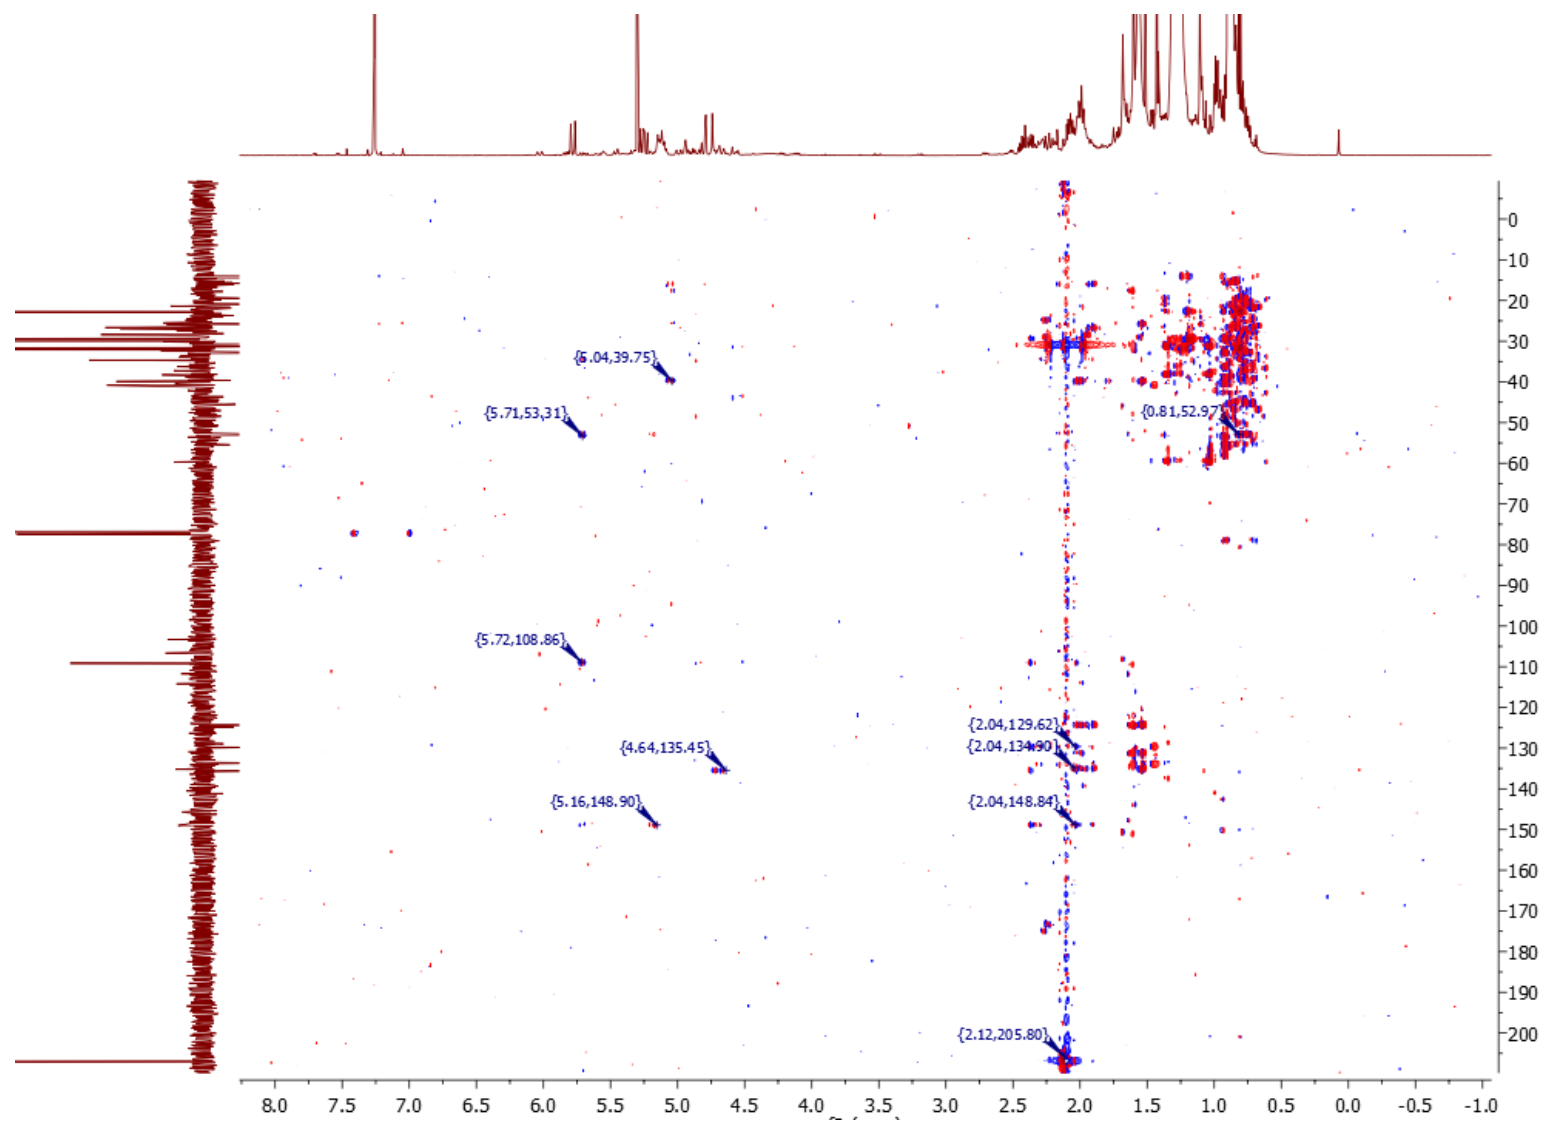

S5. COSY spectrum of compound 1

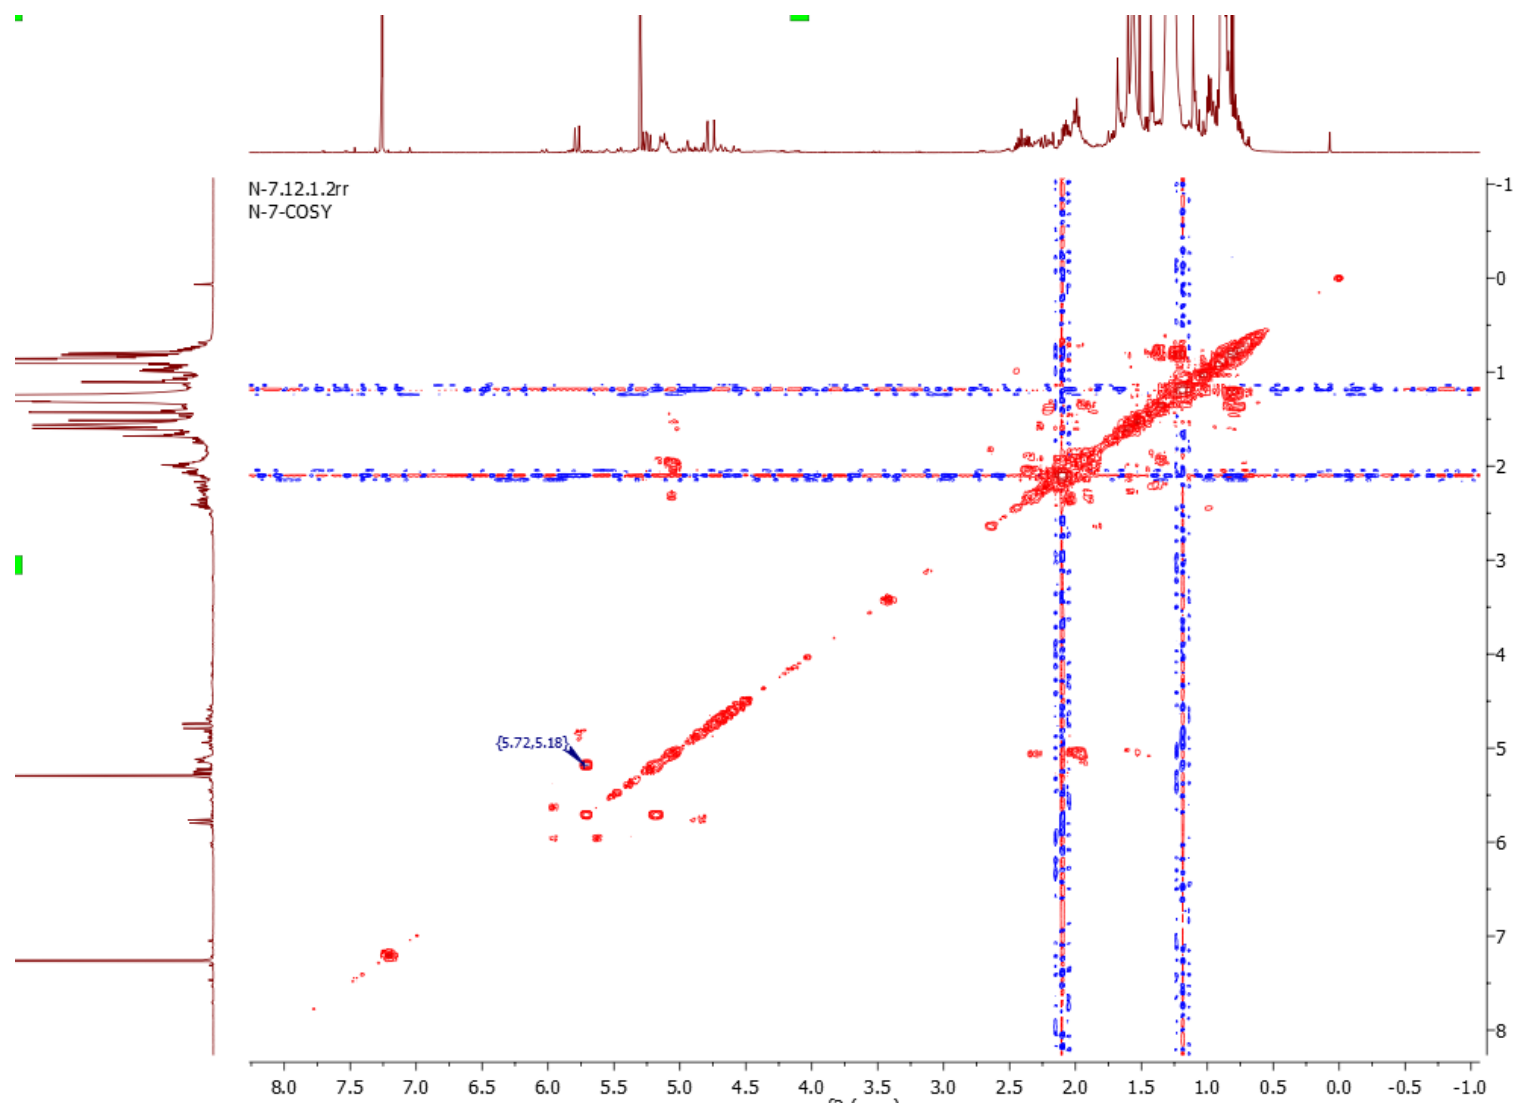

**Compound 2:**  $^1\text{H}$  NMR (500 MHz,  $\text{CD}_3\text{OD}$ ):  $\delta$ =7.99 (1H, *d*,  $J$  = 8.8 Hz, H-5), 7.54 (1H, *d*,  $J$  = 8.8 Hz, H-6), 7.47-7.45 (2H, *m*, H-2'&6'), 7.42-7.40 (3H, *m*, H-3'&5'&4'), 6.55 (1H, *d*,  $J$  = 10.07 Hz, H-2''), 5.92 (1H, *s*, H-3), 5.59 (1H, *d*,  $J$  = 10.07 Hz, H-1''), 3.83 (3H, *s*,  $\text{OCH}_3$ ), 1.48 (3H, *s*, H-4''), 1.31 (3H, *s*, H-5'').

### Spectra of compound 2

S6.  $^1\text{H}$  NMR spectrum of compound 2

S7. COSY spectrum of compound 2

S6. HNMR spectrum of compound 2

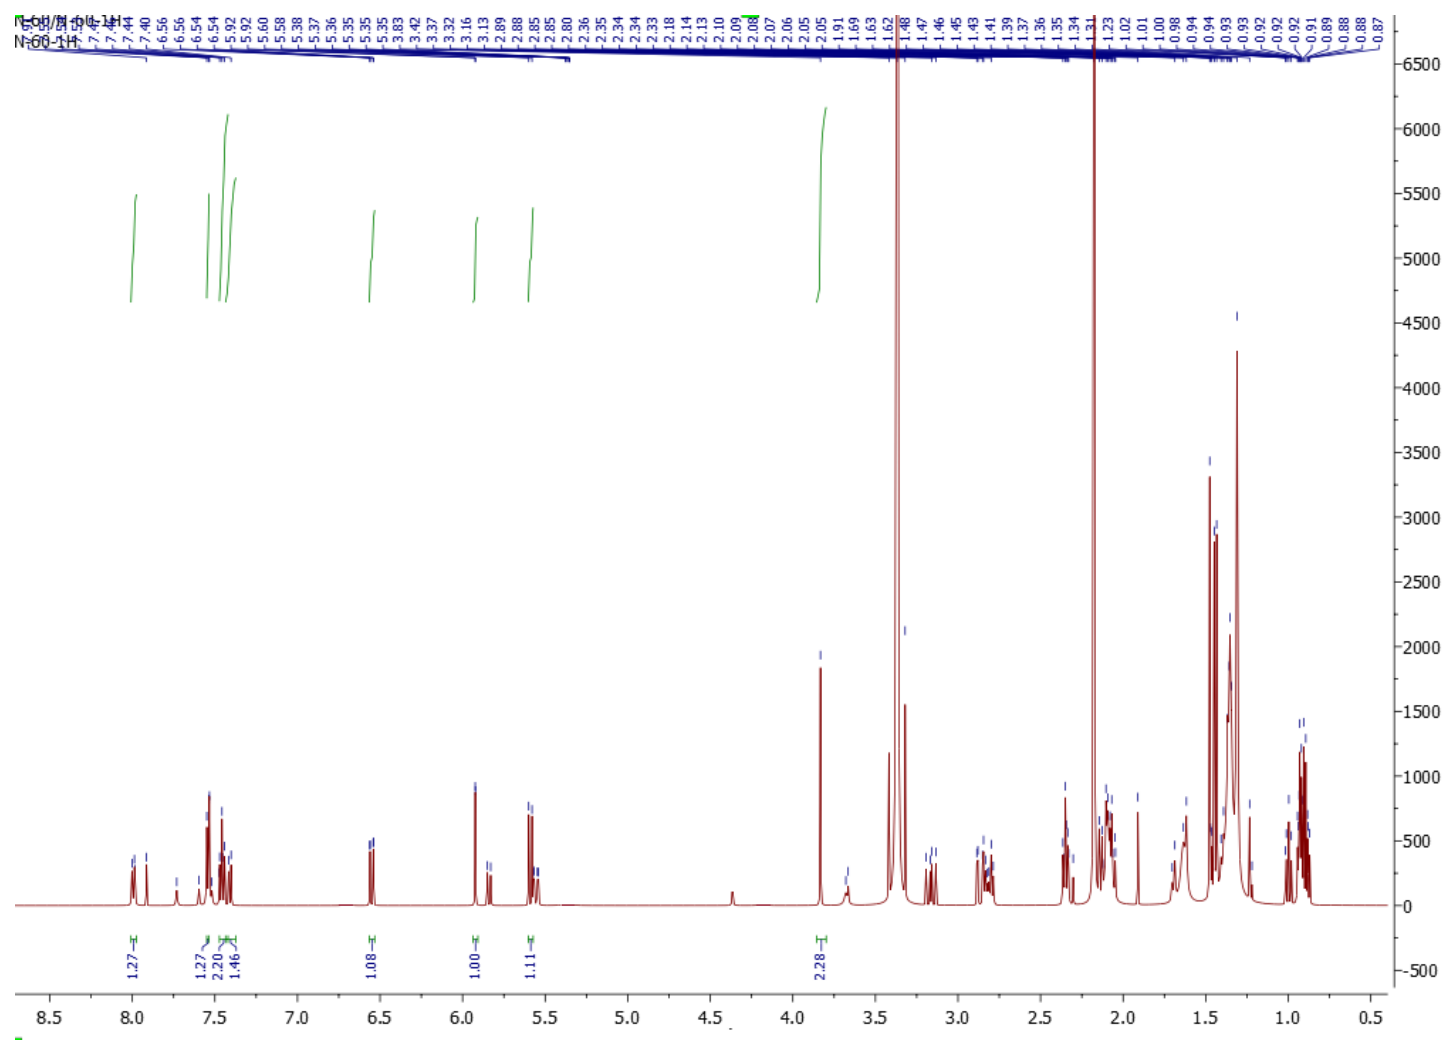



S7. COSY spectrum of compound 2

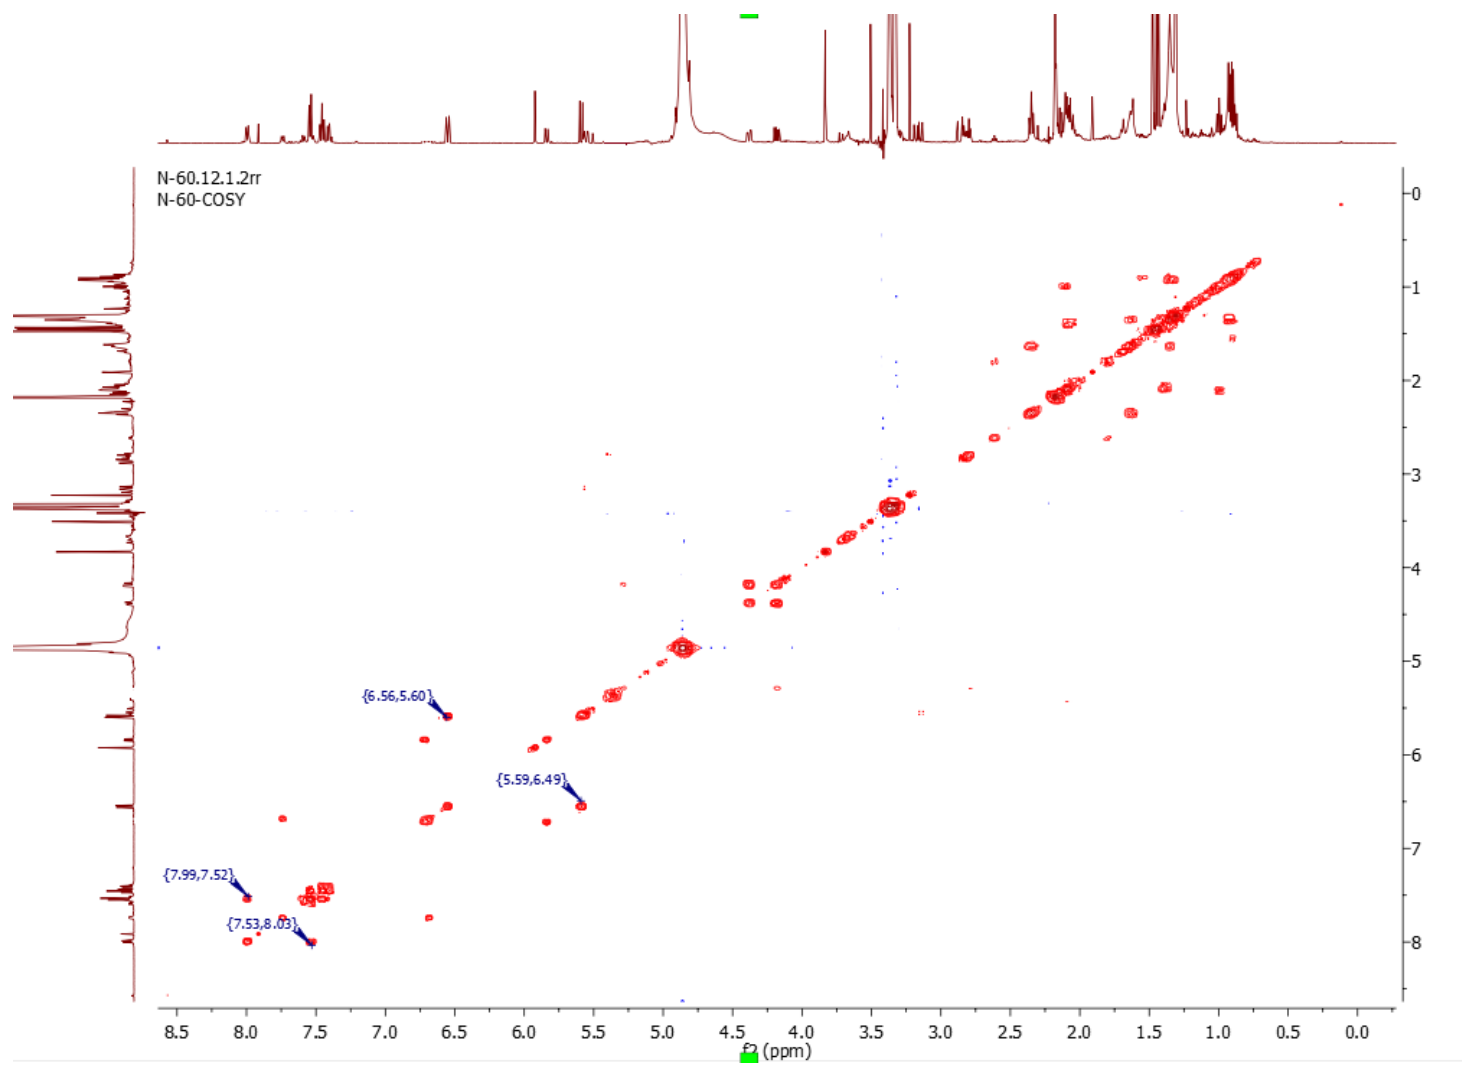

**Compounds 3 and 4:**  $^1\text{H}$  NMR spectral analyses (500 MHz,  $\text{CDCl}_3$ )  $\delta$ = 5.28 (1H, *t*, H-6), 3.45 (1H, *m*, H-3), 1.92 (2H, *m*, H-7), 1.77, 1.02 (2H, *m*, *m*, H-1), 1.77, 1.19 (2H, *m*, *m*, H-16), 1.60 (1H, *m*, H-25), 1.47, 0.98 (2H, *s*, *m*, H-15), 1.41 (2H, *m*, H-2), 1.28 (1H, *m*, H-20), 1.23, 0.94 (2H, *m*, *s*, H-22), 1.09 (2H, *m*, H-23), 0.93 (3H, *s*, H-19), 0.85 (1H, *d*, *J* = 6.5 Hz, H-9), 0.85 (3H, *d*, *J* = 6.5 Hz, H-21), 0.85 (1H, *d*, *J* = 6.5 Hz, H-24), 0.78 (3H, *d*, *J* = 7.5 Hz H-27), 0.76 (3H, *t*, H-29), 0.74 (3H, *d*, *J* = 7.5 Hz, H-26), 0.61(3H, *s*, H-18).  $^{13}\text{C}$  NMR spectral analyses (100 MHz,  $\text{CDCl}_3$ ) showed the following signals ( $\delta$  ppm): 140.9 (C-5), 121.8 (C-6), 72.0 (C-3), 56.8 (C-14), 56.2 (C-17), 50.3 (C-9), 46.01 (C-24), 42.4 (C-4), 42.4 (C-13), 39.9 (C-12), 37.4 (C-1), 36.7 (C-10), 36.3 (C-20), 34.1 (C-22), 32.1 (C-7), 32.1 (C-8), 31.8 (C-2), 29.3 (C-25), 28.4 (C-16), 26.3 (C-23), 24.5 (C-15), 23.2 (C-28), 21.2 (C-11), 19.9 (C-27), 19.6 (C-26), 19.2 (C-19), 19.0 (C-21), 12.1 (C-29), 12.0 (C-18).

### **Spectra of compound 3 & 4**

S8.  $^1\text{H}$  NMR spectrum of compounds **3 & 4**

S9.  $^{13}\text{C}$ NMR spectrum of compounds **3 & 4**

S8.  $^1\text{H}$  NMR spectrum of compounds **3** & **4**

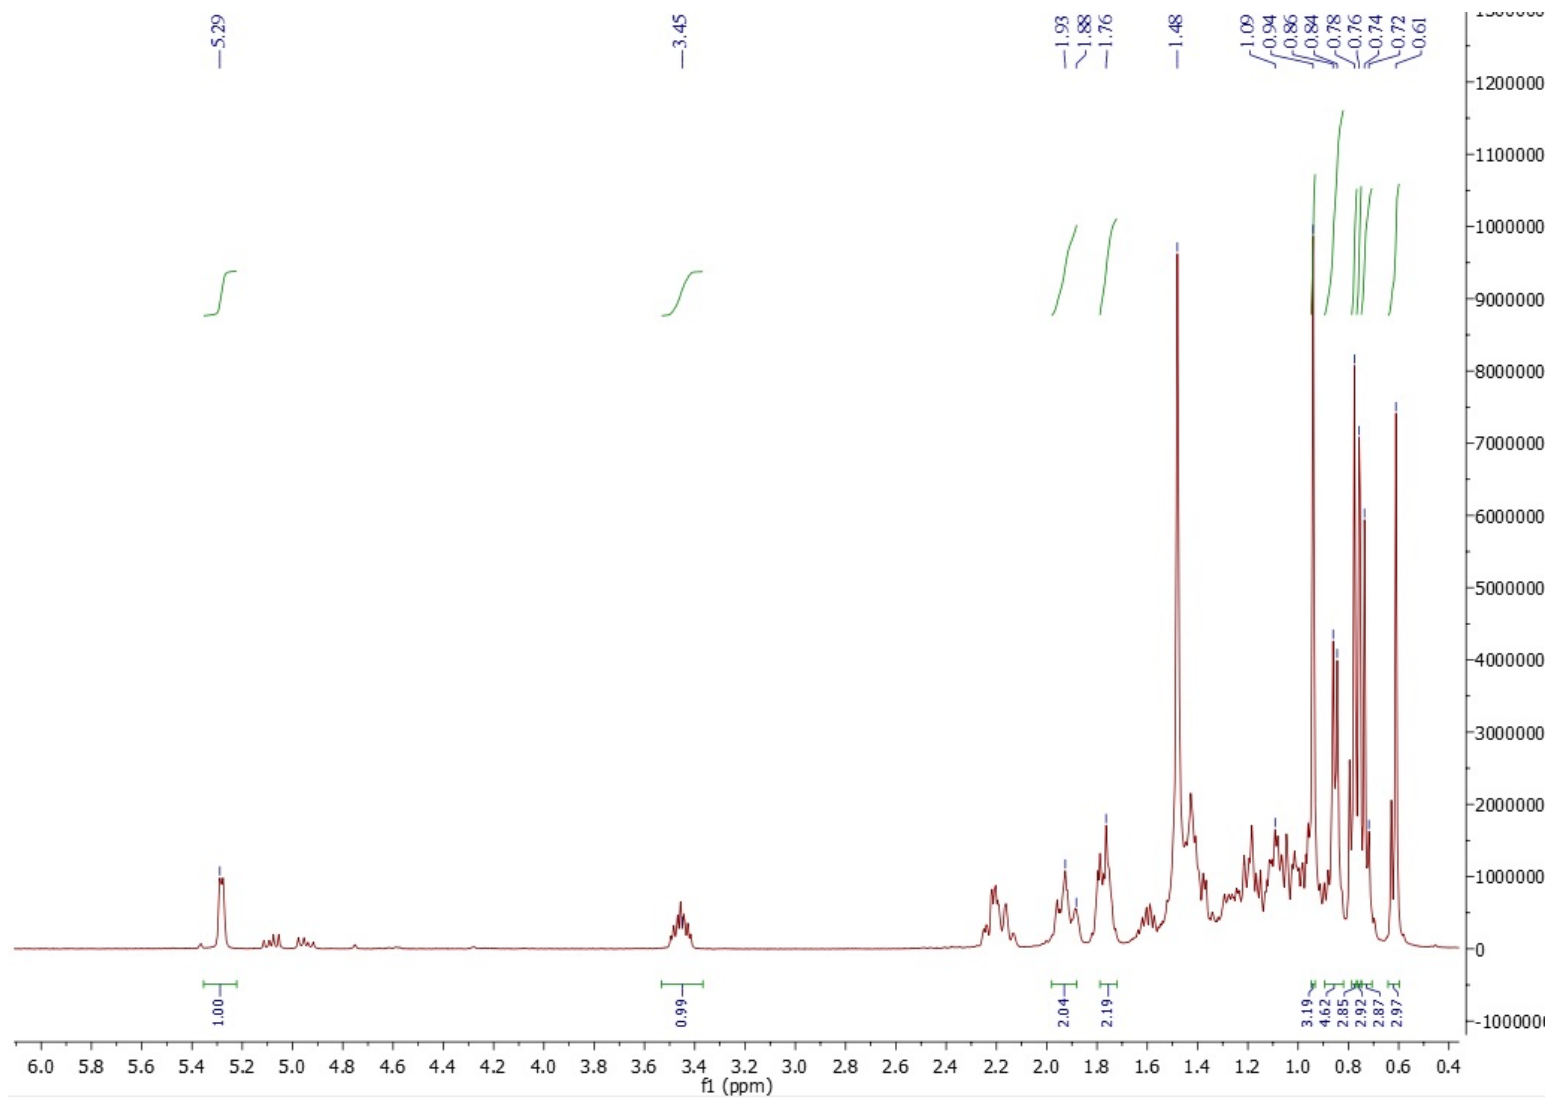

S9.  $^{13}\text{C}$ NMR spectrum of compounds **3** & **4**

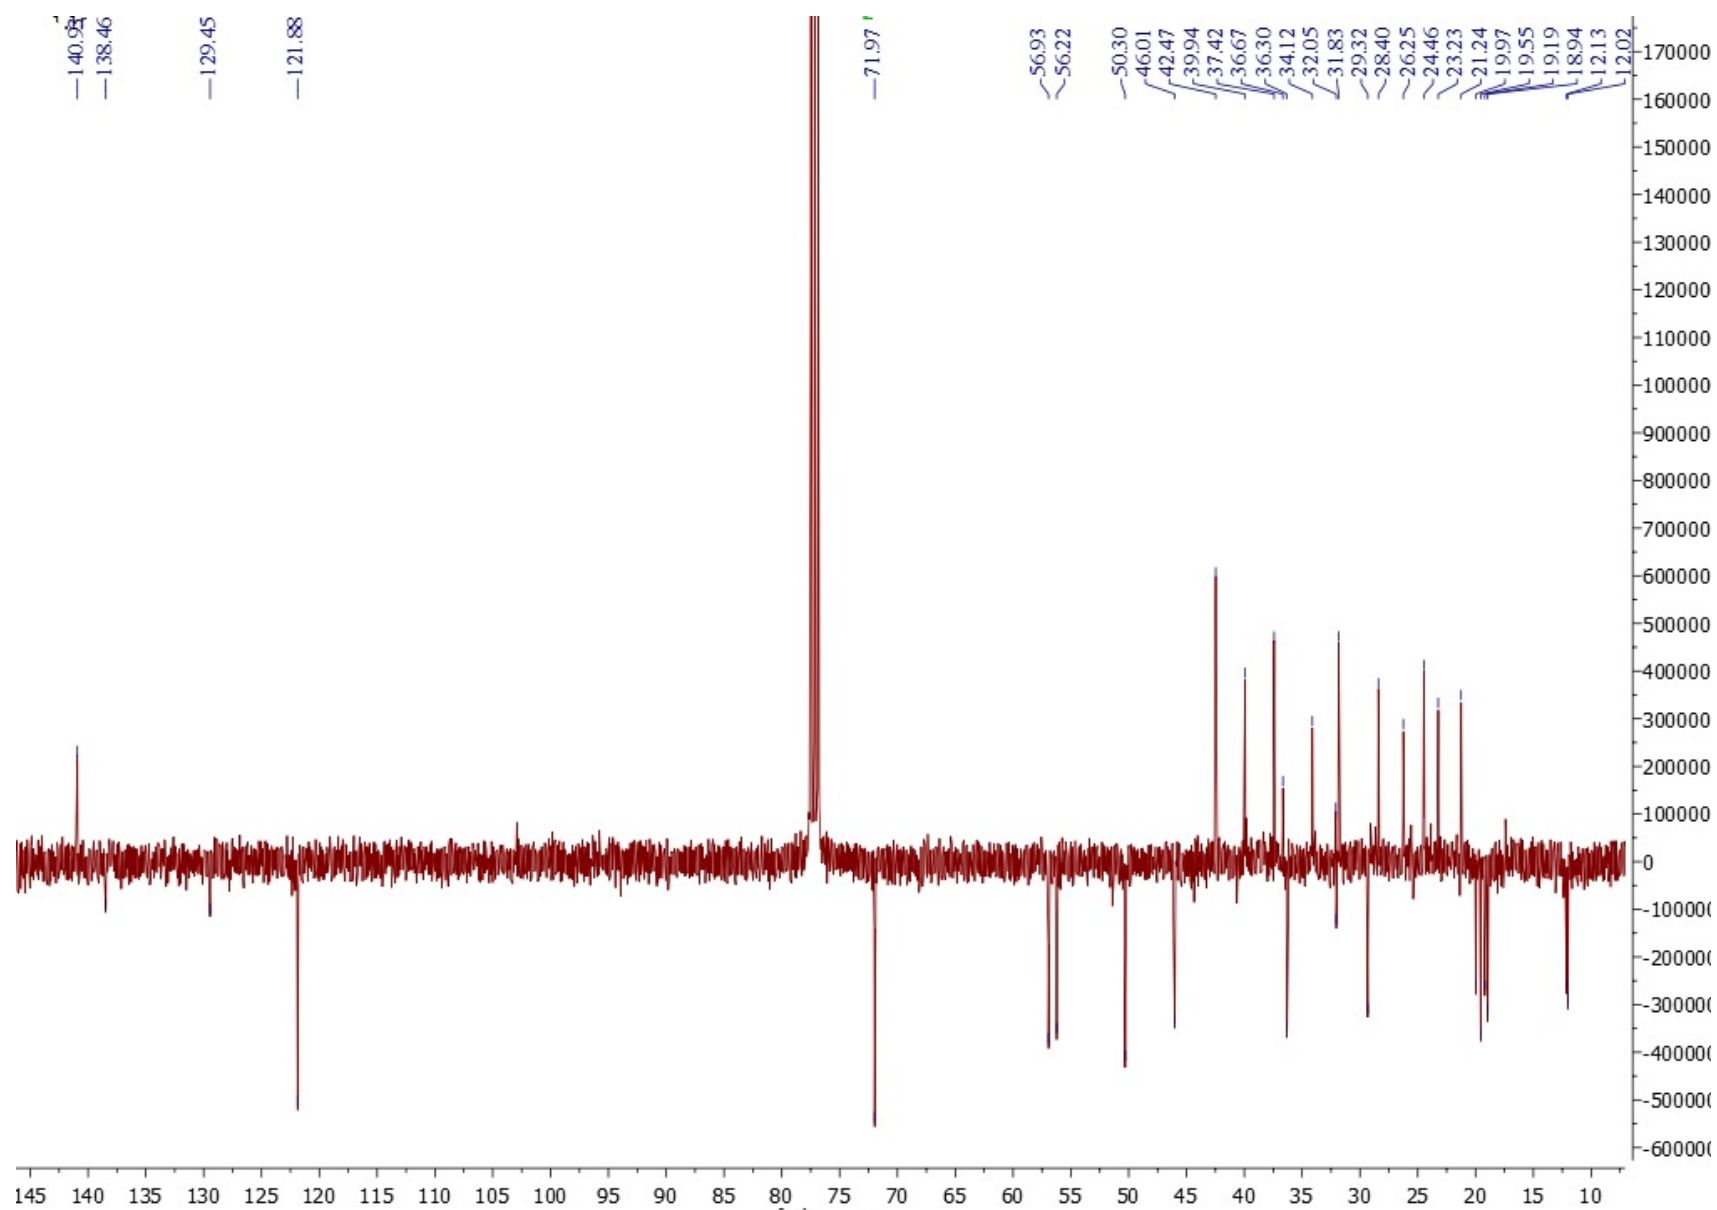

Supplement: s1 [file s1]
